# Supplementary material for: Large-Scale Synthesis of Tunable Fluorescent Carbon Dots Powder for Light-Emitting Diodes and Fingerprint Identification
Source: MDPI journal article supplement (doi:10.3390/molecules28155917), 2023-08-07
Supplement: s1 [file s1]

# **Large-scale synthesis of tunable fluorescent carbon dots powder for light-emitting diodes and fingerprint identification**

Lei Zhao<sup>1,\*</sup>, Dong Zhang<sup>3</sup>, Xin Wang<sup>2</sup>, Yang Li<sup>4</sup>, Zihan Li<sup>2</sup>, Hua Wei<sup>2</sup>, Boxuan Yao<sup>2</sup>,  
Dinggong Tao<sup>1,\*</sup>, Zifan Wang<sup>1,\*</sup>

<sup>1</sup>*Key Laboratory of Biotechnology and Bioengineering of State Ethnic Affairs Commission, Biomedical Research Center; Engineering Research Center of Key Technology and Industrialization of Cell-based Vaccine, Ministry of Education; Gausu Tech Innovation Center of Animal; China-Malaysia National Joint Laboratory, Northwest Minzu University, Lanzhou, 730030, P. R. China.*

<sup>2</sup>*School of Chemistry and Chemical Engineering, Qilu University of Technology (Shandong Academy of Sciences), Jinan, 250353, P. R. China.*

<sup>3</sup> *School of Chemical Engineering, Northwest Minzu University, Lanzhou, 730030, P. R. China.*

<sup>4</sup> *Lanzhou Hualian Xinminao Dental Clinic, Lanzhou, 730000, P. R. China.*

\* Corresponding author.

E-mail: zhaoleixbmz@163.com (L. Zhao), dinggongtao@outlook.com (G. Ding),

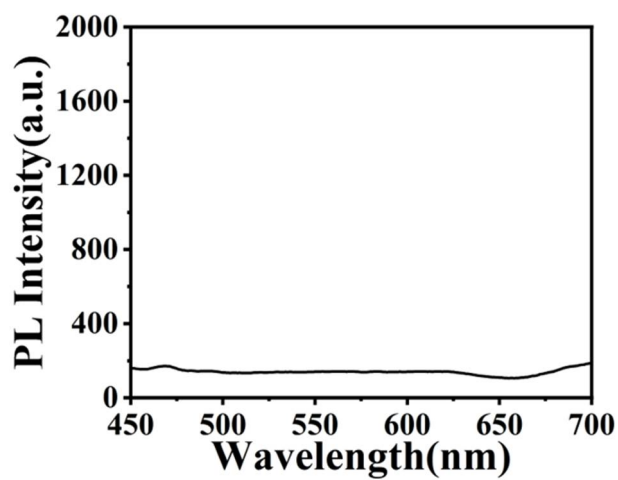

**Figure S1.** The emission spectrum of obtained product just using phloroglucinol as reactant.

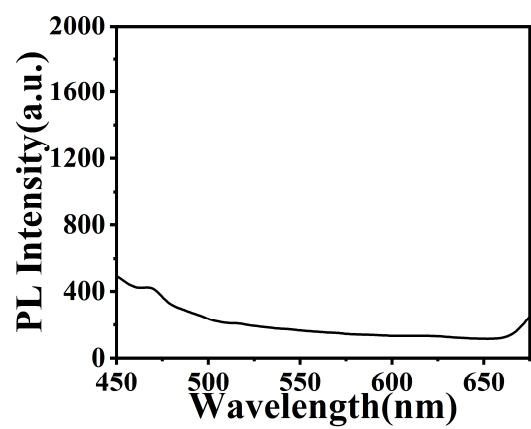

**Figure S2.** The emission spectrum of obtained product just using butanedioic acid as reactant.

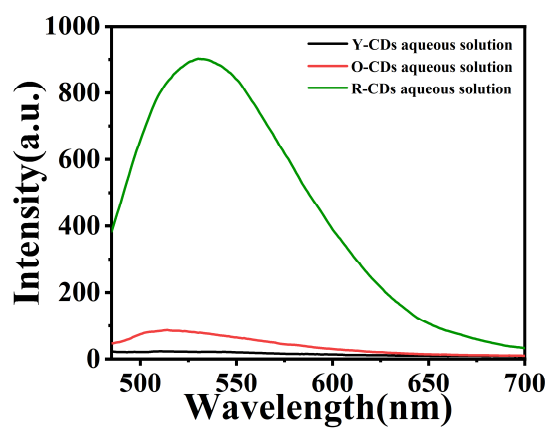

**Figure S3.** The emission spectra of Y-/O-/R-CDs aqueous solution.

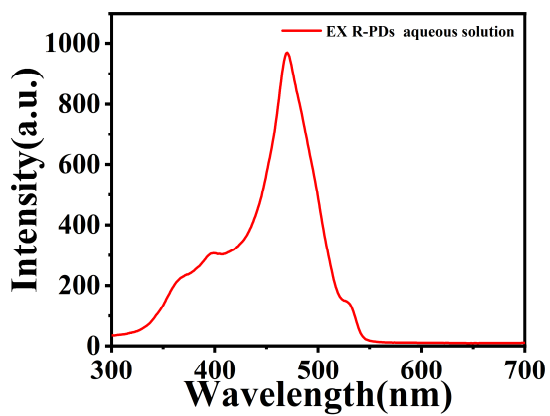

**Figure S4.** The excitation spectrum of R-CDs aqueous solution.

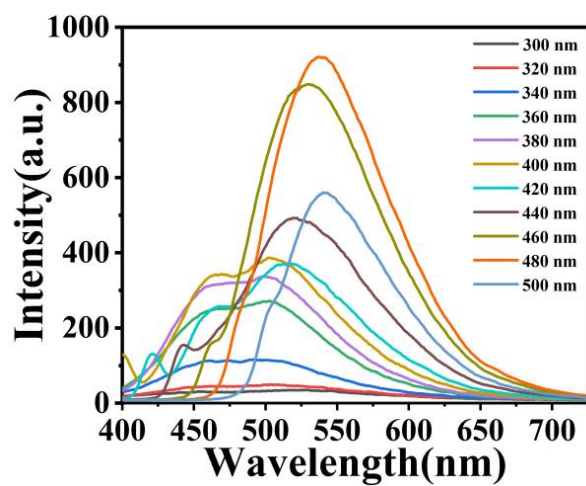

**Figure S5.** The emission spectra of R-CDs aqueous solution under excitation wavelengths.

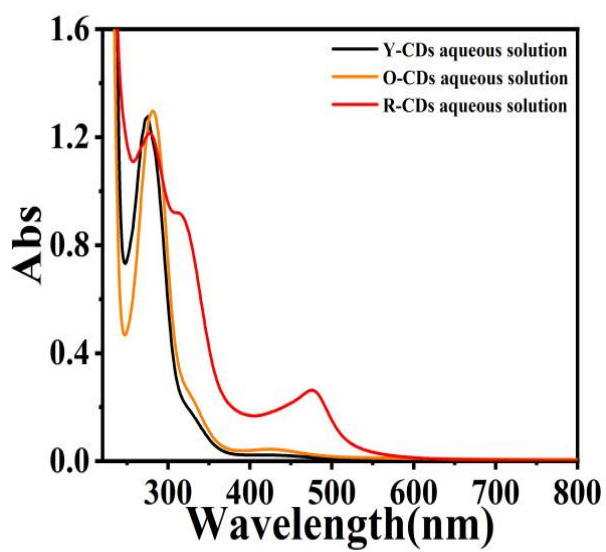

**Figure S6.** The UV-Visible spectra of Y-/O-/R-CDs aqueous solution.

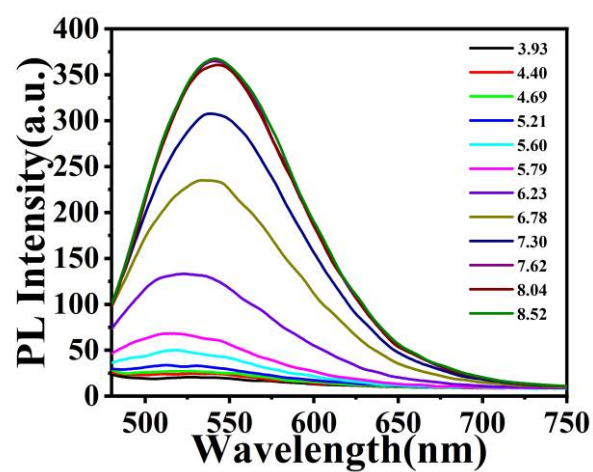

**Figure S7.** The emission spectra of R-CDs aqueous solution with different pH.

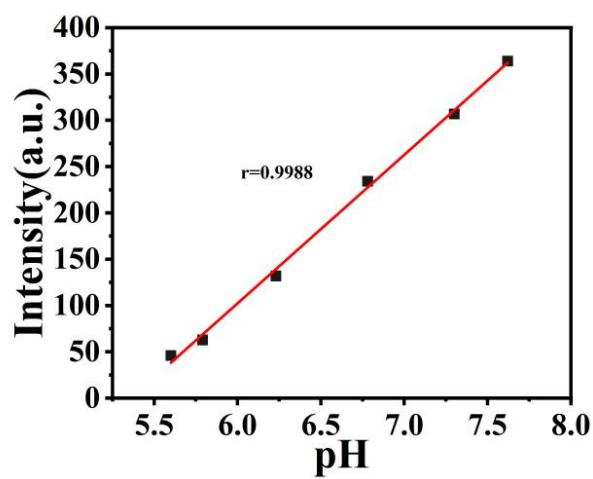

**Figure S8.** The linear relation between the fluorescence intensity of R-CDs aqueous solution and pH change.

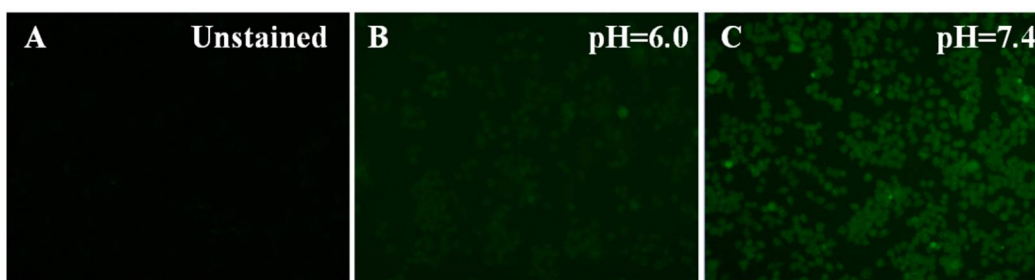

**Figure S9.** The fluorescent microscopy images of unstained HeLa cells and staining by R-CDs under pH 6.0 and 7.0.

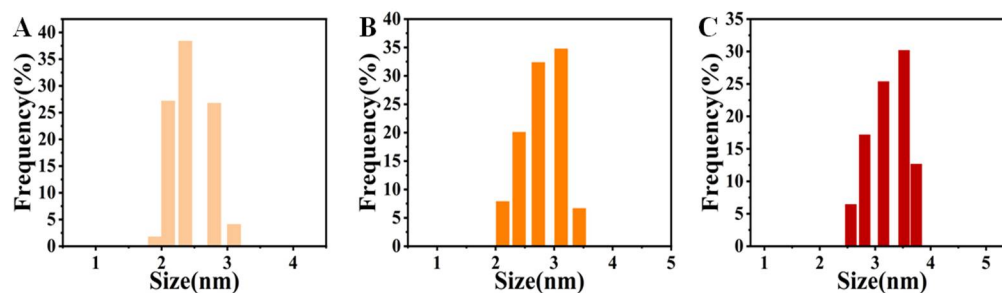

**Figure S10.** The size distribution of Y-CDs (A), O-CDs (B), and R-CDs (C).

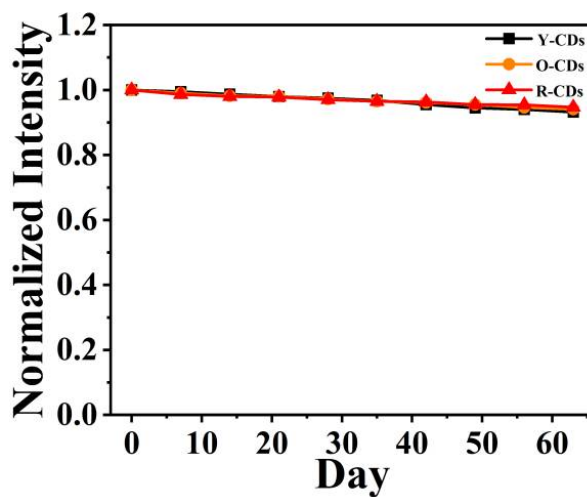

**Figure S11.** The fluorescence intensities of Y-/O-/R-CDs fluorescent powder after storing different days.

**Table S1** Values (%) of each peak fitted in O1s.

|       | C=O(%) | C-O(%) |
|-------|--------|--------|
| Y-CDs | 51.2   | 48.8   |
| O-CDs | 30.6   | 69.4   |
| R-CDs | 10.6   | 89.4   |
